# Supplementary material for: Post-emergence seedling damage due to vertebrate pests and its impact on soybean establishment
Source: PeerJ journal article supplement (doi:10.7717/peerj.11106), 2021-03-31
Supplement: TableS1.docx [file TableS1.docx]

**Table S1.** Post emergence damage (mean ± standard deviation) caused by pigeons and wild hares on soybean at the individual spatial plot scale. Green highlight: plots that are closer to the canal and farther from the residential area; yellow highlight: plots that are closer to the residential area and farther from the canal.

| **Year** | **Plot** | **Partially-damaged cotyledons (%)** | **Uprooted seedlings (%)** | **Chewed plantlets (%)** | **Total damage (%)** |
| --- | --- | --- | --- | --- | --- |
| 2018 | Evapo | 13 ± 3 | 16 ± 3 | 22 ± 6 | 51 ± 11 |
|  | Micmac | 12 ± 3 | 15 ± 5 | 29 ± 10 | 56 ± 15 |
|  | Cantine | 13 ± 3 | 29 ± 7 | 3 ± 2 | 45 ± 8 |
| 2020 | TE | 7 ± 2 | 14 ± 3 | 19 ± 4 | 40 ± 8 |
|  | Micmac | 9 ± 2 | 18 ± 6 | 20 ± 9 | 47 ± 13 |
|  | Micro-Est | 5 ± 2 | 11 ± 8 | 13 ± 13 | 28 ± 22 |
|  |  |  |  |  |  |
